# Supplementary material
Source: publisher site journal article supplement (https://www.dovepress.com/article/218248)
Supplement: Supplementary file 1 [file get_supplementary_file.php]

**Supplementary material**


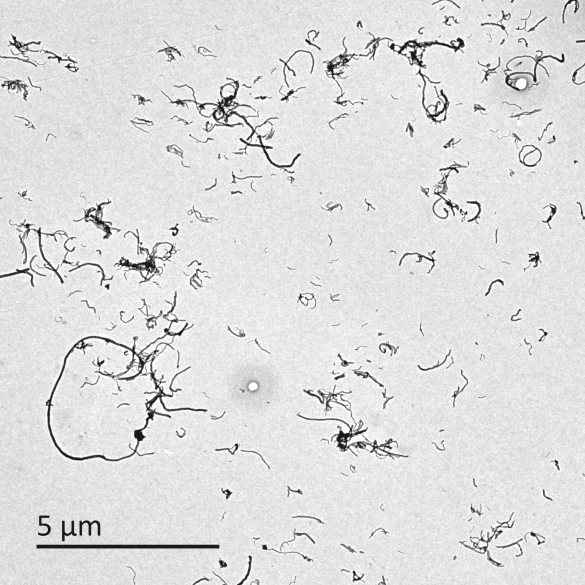

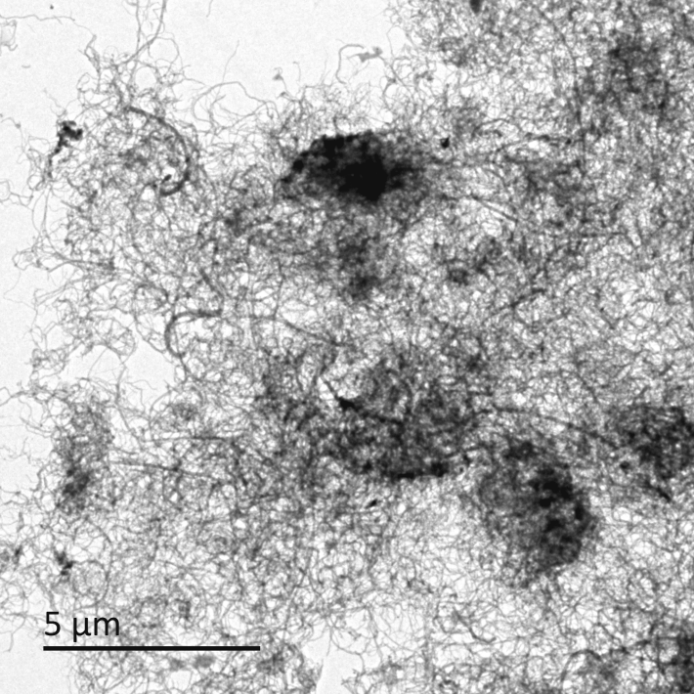


A

B

**Figure S1**. Representative Transmission Electron Microscopy images of the MWCNTs (n = 3 samples/treatment for each batch); (A) ‘as received’ MWCNTs depicting the agglomerated nanotubes. (B) Functionalised MWCNTs by oxidation with nitric acid. Note the fragmented nanotubes due to the oxidation process are shorter than the original material in panel (A).
